# Supplementary material for: Production of Archaeal Inositol Phospholipids in Engineered Saccharomyces cerevisiae
Source: Research Square preprint supplement (doi:10.21203/rs.3.rs-8072063/v1), 2025-11-11
Supplement: Supplementary file 1 [file 25e16964010a2895629d0ea3.docx]

**Supplementary Information**

**Production of Archaeal Inositol Phospholipids in Engineered *Saccharomyces cerevisiae***

Jinze Li, Shizhe Zhang, Erpeng Guo, Zhilai Hong, Tong Si

State Key Laboratory for Quantitative Synthetic Biology, Shenzhen Institute of Synthetic Biology, Shenzhen Institutes of Advanced Technology, Chinese Academy of Sciences, Shenzhen 518055, China

**Supplementary Figures**

Supplementary Fig. 1 | 1D and 2D NMR analysis of uDoPhPI

Supplementary Fig. 2 | Sequence Similarity Network (SSN) analysis for AIPS amino acid sequences

**Supplementary Tables**

Supplementary Table 1 | Plasmids

Supplementary Table 2 | Primers and synthetic gene sequence

Supplementary Table 3 | Strains

Supplementary Table 4 | Electroformation protocol for GUVs preparation

# Supplementary Figures


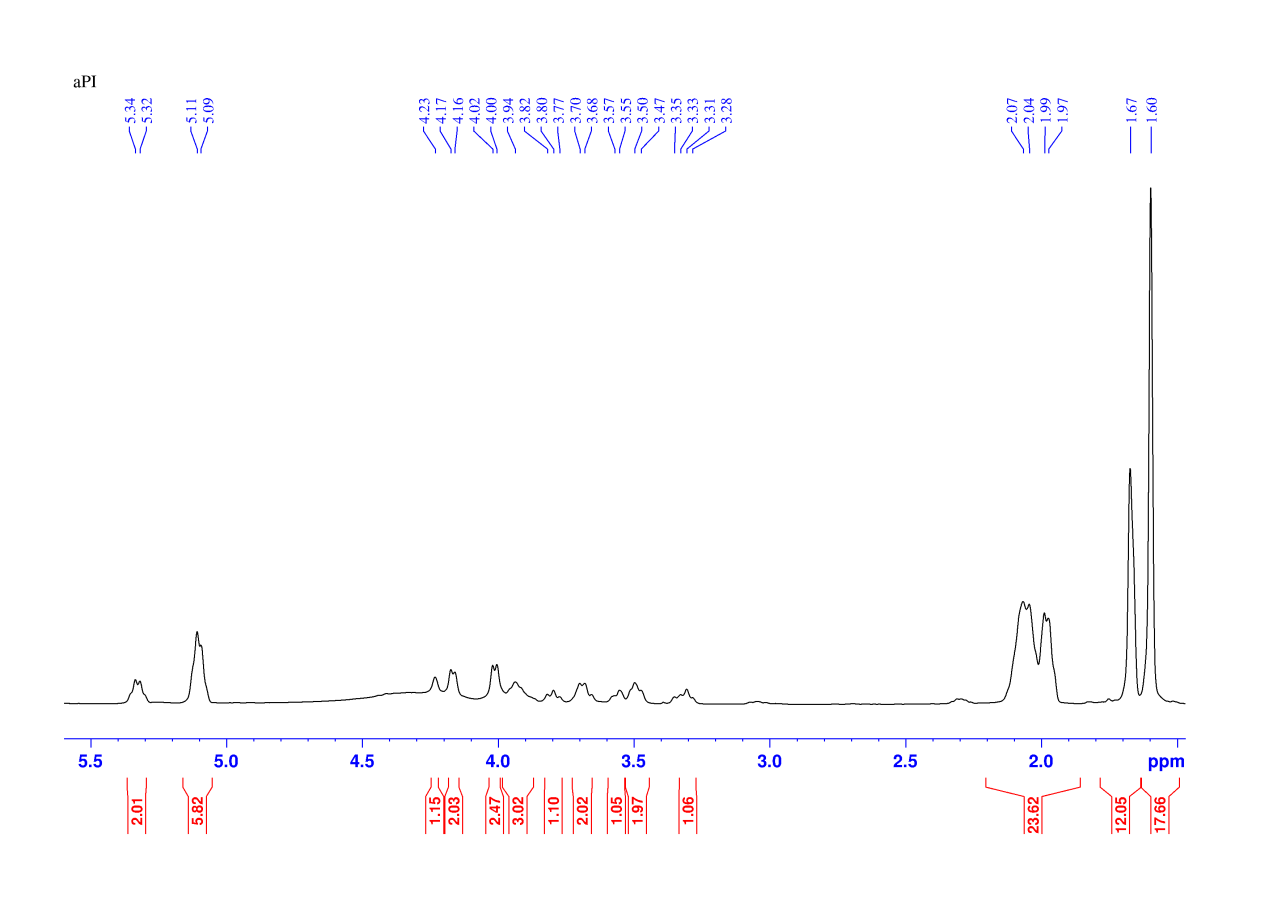


(a) uDoPhPI-1H NMR


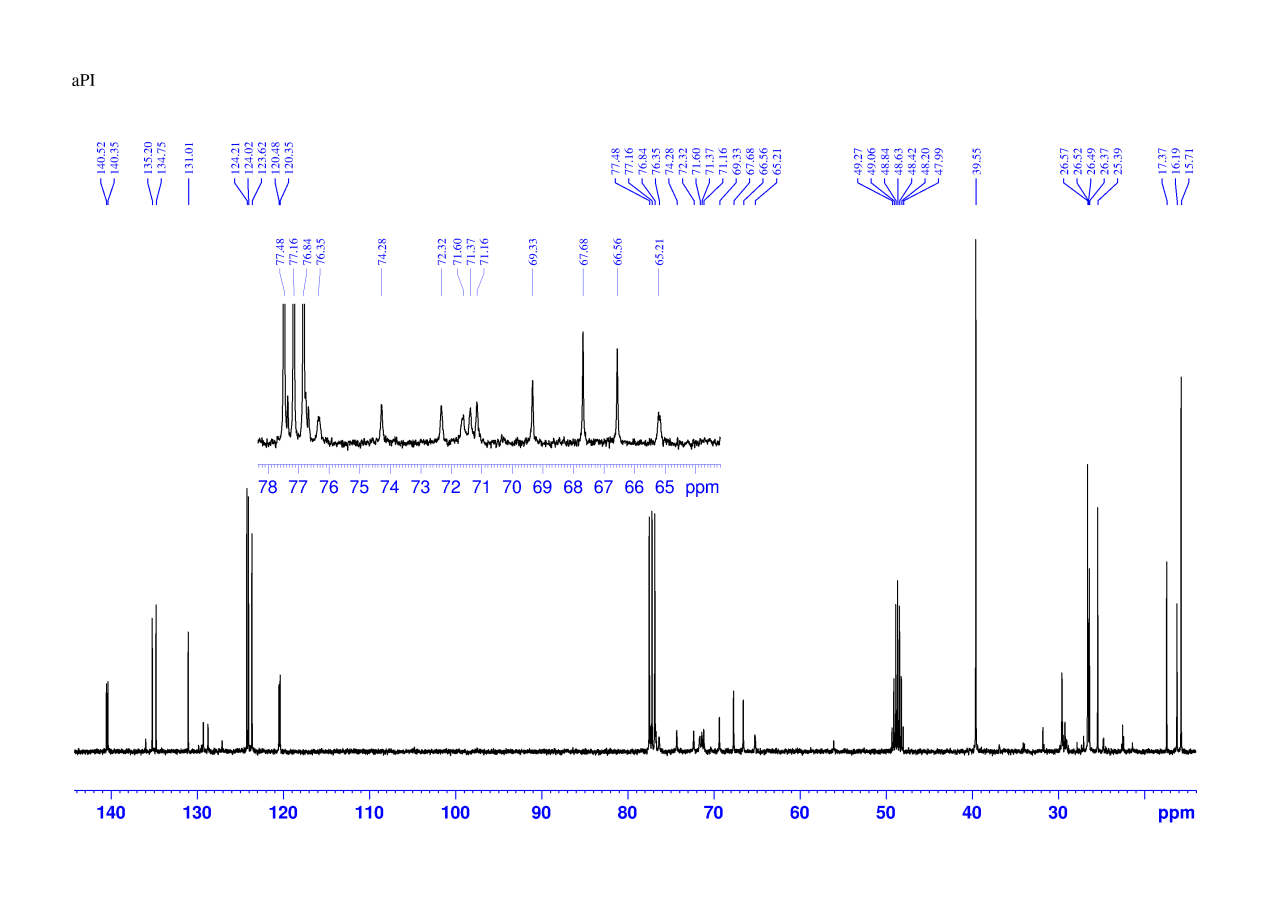


(b) uDoPhPI-13C NMR


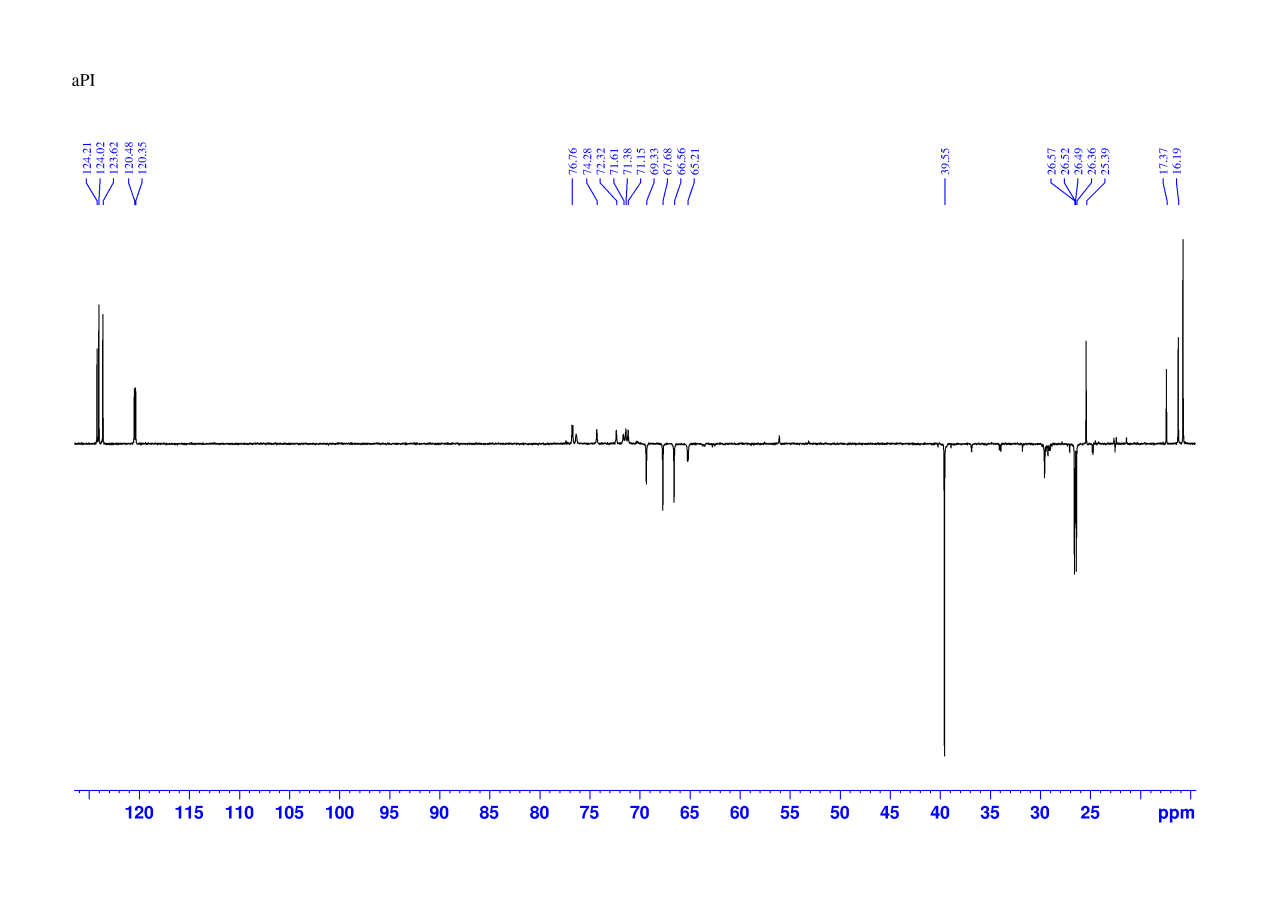


(c) uDoPhPI-13C DEPT-135 NMR


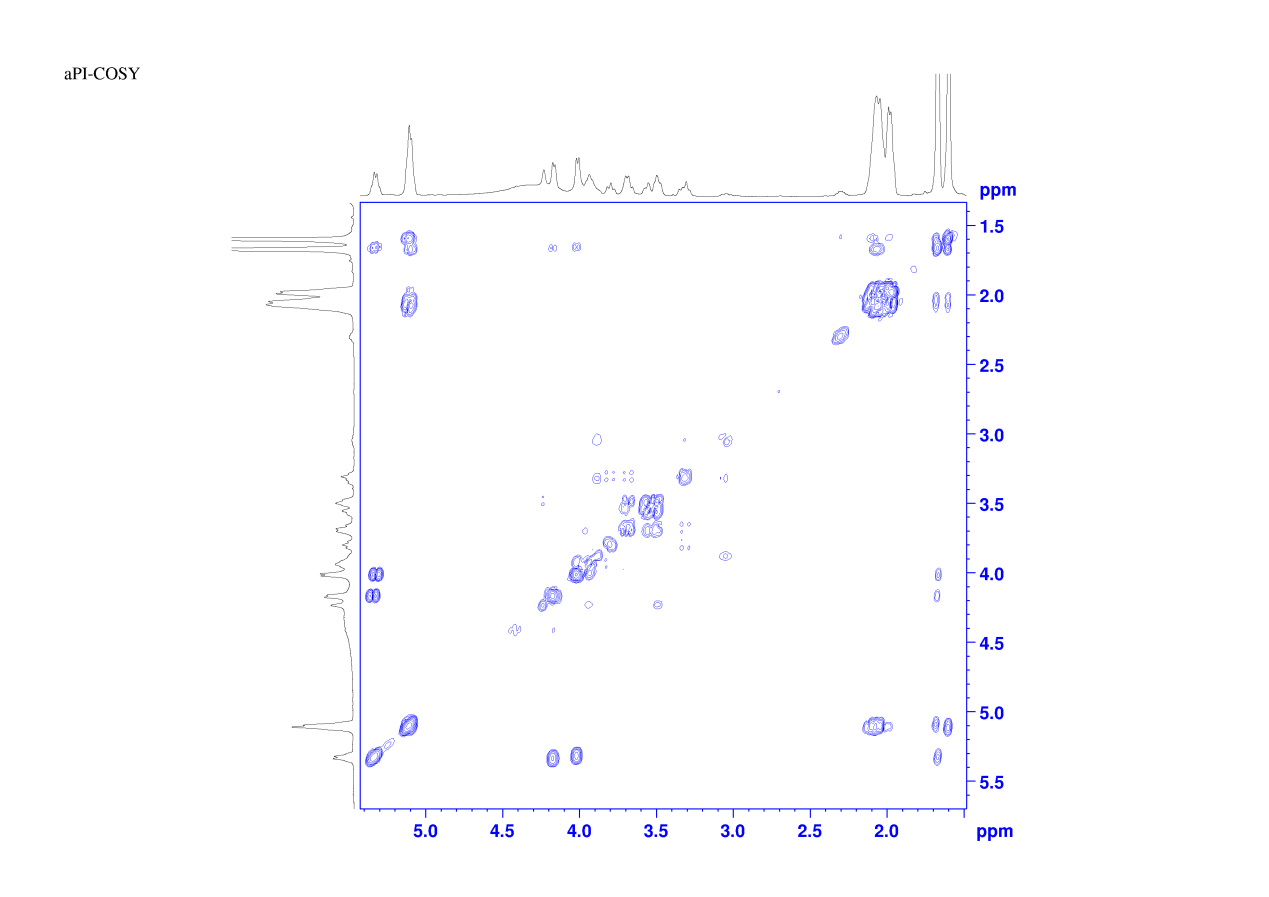


(d) uDoPhPI-COSY


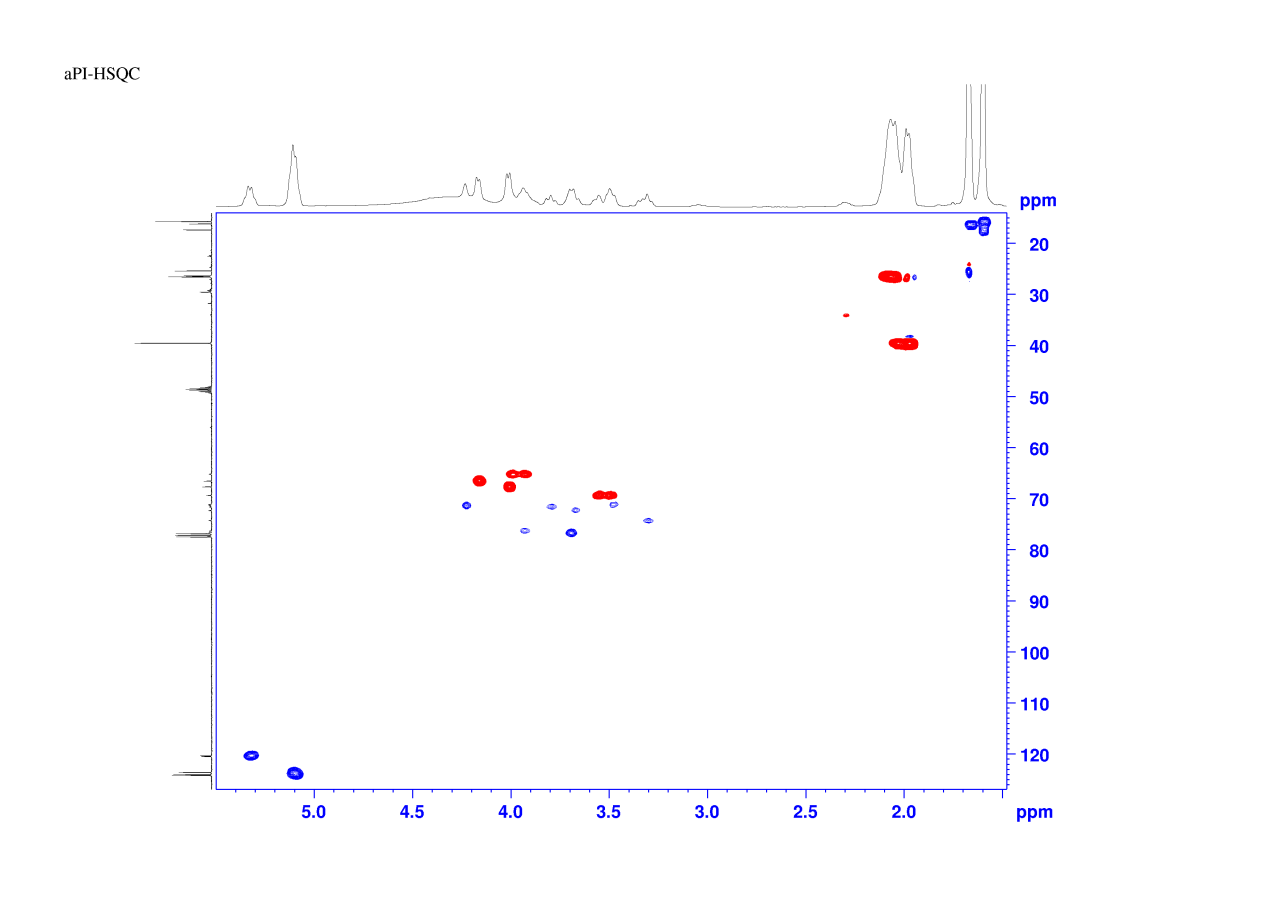


(e) uDoPhPI-HSQC


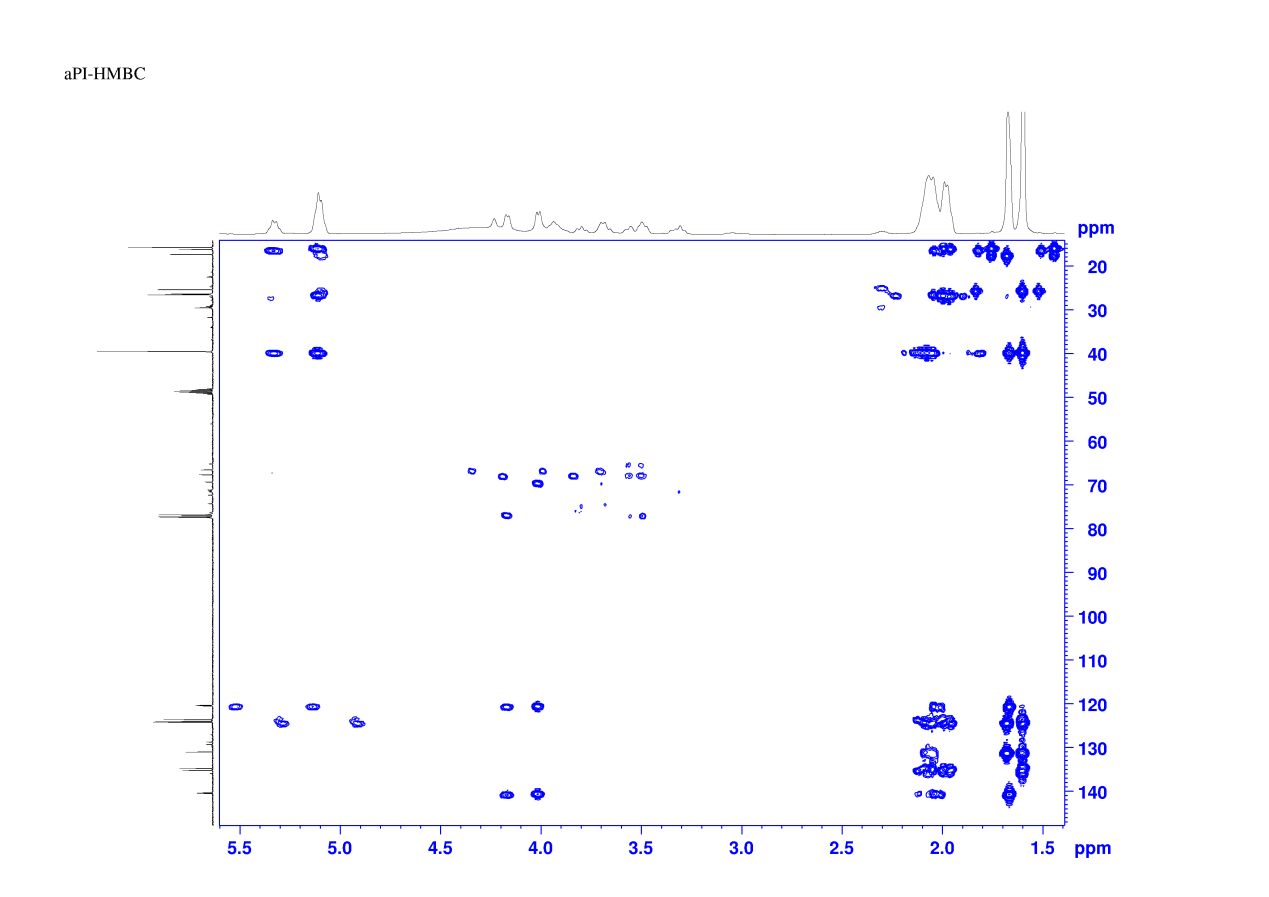


(f) uDoPhPI-HMBC

## Supplementary Figure 1 | 1D and 2D NMR analysis of uDoPhPI. (a) 1H NMR, (b) 13C NMR, (c) 13C DEPT-135 NMR, (d) 1H-1H Correlation Spectroscopy (COSY), (e) 1H-13C Heteronuclear Single Quantum Coherence (HSQC), (f). 1H-13C Heteronuclear Multiple Bond Correlation (HMBC) spectra.


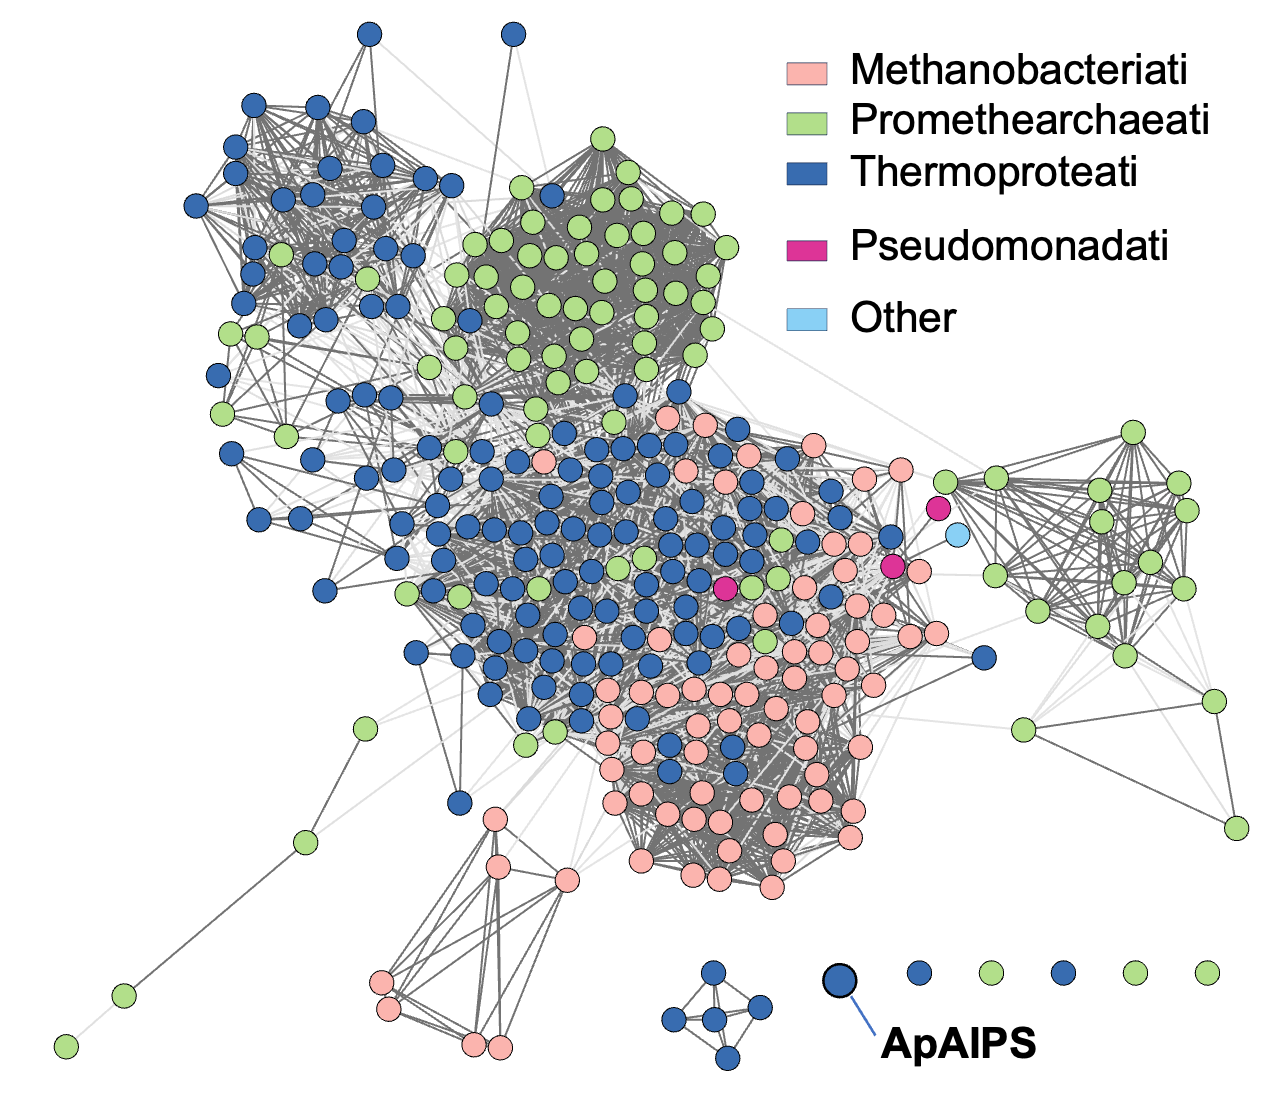


## Supplementary Figure 2 | Sequence Similarity Network (SSN) analysis for AIPS amino acid sequences. Edges between pairs of representative nodes (70% identity) indicate an alignment score of 30 or higher.

# Supplementary Tables

## Supplementary Table 1 | Plasmids

| **Plasmids** | **Description** | **Reference** |
| --- | --- | --- |
| pYTK001-AfCarS | Level 0 biopart, CarS gene from *A. fulgidus* cloned into pYTK001-ccdB | Zhang et al., 2023 |
| pYTK001-Venus | Level 0 biopart, Venus gene was amplificated from pYTK058 cloned into pYTK001-ccdB | Zhang et al., 2023 |
| pYTK005 | ConL3 biopart for level 1 gene cassette plasmid assembly | Lee et al., 2015 |
| pYTK070 | ConR4 biopart for level 1 gene cassette plasmid assembly | Lee et al., 2015 |
| pYTK006 | ConL4 biopart for level 1 gene cassette plasmid assembly | Lee et al., 2015 |
| pYTK071 | ConR5 biopart for level 1 gene cassette plasmid assembly | Lee et al., 2015 |
| pYTK007 | ConL5 biopart for level 1 gene cassette plasmid assembly | Lee et al., 2015 |
| pYTK072 | ConRE biopart for level 1 gene cassette plasmid assembly | Lee et al., 2015 |
| pYTK030 | PGAL1 promoter biopart for level 1 gene cassette plasmid assembly | Lee et al., 2015 |
| pYTK040 | 6×His_3×Flag biopart for level 1 gene cassette plasmid assembly | Lee et al., 2015 |
| pYTK051 | TENO1 terminator biopart for level 1 gene cassette plasmid assembly | Lee et al., 2015 |
| pYTK095-MaG1PDH | Level 1 gene cassette; overexpression of codon-optimized G1PDH gene from *M. acetivorans* under PGAL1 inducible promoter and TENO1 terminator; 6×His_3×Flag tag; ConLS and ConR1 connectors; AmpR | Zhang et al., 2023 |
| pYTK095-MaGGGPS | Level 1 gene cassette; overexpression of codon-optimized GGGPS gene from *M. acetivorans* under PGAL1 inducible promoter and TENO1 terminator; 6×His_3×Flag tag; ConL1 and ConR2 connectors; AmpR | Zhang et al., 2023 |
| pYTK095-MaDGGGPS | Level 1 gene cassette; overexpression of codon-optimized DGGGPS gene from *M. acetivorans* under PGAL1 inducible promoter and TENO1 terminator; 6×His_3×Flag tag; ConL2 and ConR3 connectors; AmpR | Zhang et al., 2023 |
| pYTK095-AfCarS | Level 1 gene cassette; overexpression of codon-optimized CarS gene from *A. fulgidus* under PGAL1 inducible promoter and TENO1 terminator; 6×His_3×Flag tag; ConL3 and ConR4 connectors; AmpR | This study |
| pYTK095-ApAIPS | Level 1 gene cassette; overexpression of codon-optimized AIPS gene from *A. pernix* under PGAL1 inducible promoter and TENO1 terminator; 6×His_3×Flag tag; ConL4 and ConR5 connectors; AmpR | This study |
| pYTK095-ScINO1 | Level 1 gene cassette; overexpression of INO1 gene from *S. cerevisiae* under PGAL1 inducible promoter and TENO1 terminator; 6×His_3×Flag tag; ConL5 and ConRE connectors; AmpR | This study |
| pYTK095-MaG1PDHΔ::Venus | Derived from Level 1 gene cassette pYTK095-MaG1PDH where MaG1PDH was replaced by Venus; ConLS and ConR1 connectors; AmpR | Zhang et al., 2023 |
| pYTK095- AfCarSΔ::Venus | Derived from Level 1 gene cassette pYTK095-AfCarS where AfCarS was replaced by Venus; ConL3 and ConR4 connectors; AmpR | This study |
| pYTK095- ApAIPSΔ::Venus | Derived from Level 1 gene cassette pYTK095-ApAIPS where ApAIPS was replaced by Venus; ConL4 and ConR5 connectors; AmpR | This study |
| pYTK095- ScINO1Δ::Venus | Derived from Level 1 gene cassette pYTK095-ScINO1 where ScINO1 was replaced by Venus; ConL5 and ConRE connectors; AmpR | This study |
| pYTK095-ccdB | Derived from pYTK095, original GFP gene was replaced by ccdB gene | Zhang et al., 2023 |
| pYTK096-ccdB | Level 2 receiving plasmid; Derived from pYTK096, original GFP gene was replaced by ccdB gene, original LEU expression cassette was removed and original URA homologous sequence was replaced by *106a* locus homologous sequence of *S. cerevisiae*, and *Not*I restriction sites were added to both sides of *106a* homologous sequences to linearize the plasmid; KanR | Zhang et al., 2023 |
| pYTK096-Ma | Level 2 composite pathway from *M. acetivorans* (G1PDH, GGGPS, DGGGPS) and *A. fulgidus* (CarS); Derived from pYTK095-MaG1PDH, pYTK095-MaGGGPS, pYTK095-MaDGGGPS, pYTK095-AfCarS as donor plasmids and pYTK096-ccdB as receiving plasmid; KanR | Zhang et al., 2023 |
| pYTK096-4U+ApAIPS | Level 2 composite pathway from MaG1PDH, MaGGGPS, MaDGGGPS, AfCarS, and ApAIPS; ScINO1 gene replaced by Venus; Derived from pYTK095-MaG1PDH, pYTK095-MaGGGPS, pYTK095-MaDGGGPS, pYTK095-AfCarS, pYTK095-ApAIPS, pYTK095-ScINO1Δ::Venus as donor plasmids and pYTK096-ccdB as receiving plasmid; KanR | This study |
| pYTK096-4U+ScINO1 | Level 2 composite pathway from MaG1PDH, MaGGGPS, MaDGGGPS, AfCarS, and ScINO1; ApAIPS replaced by Venus; Derived from pYTK095-MaG1PDH, pYTK095-MaGGGPS, pYTK095-MaDGGGPS, pYTK095-AfCarS, pYTK095-INO1, pYTK095-ApAIPSΔ::Venus as donor plasmids and pYTK096-ccdB as receiving plasmid; KanR | This study |
| pYTK096-4U+ApAIPS+ScINO1 | Level 2 composite pathway from MaG1PDH, MaGGGPS, MaDGGGPS, AfCarS, ApAIPS, and ScINO1; Derived from pYTK095-MaG1PDH, pYTK095-MaGGGPS, pYTK095-MaDGGGPS, pYTK095-AfCarS, pYTK095-ApAIPS, pYTK095-ScINO1 as donor plasmids and pYTK096-ccdB as receiving plasmid; KanR | This study |
| pYTK096-4U(G1PDHΔ)+ApAIPS+ScINO1 | Level 2 composite pathway from MaGGGPS, MaDGGGPS, AfCarS, ApAIPS, and ScINO1; MaG1PDH replaced by Venus; Derived from pYTK095-MaGGGPS, pYTK095-MaDGGGPS, pYTK095-AfCarS, pYTK095-ApAIPS, pYTK095-ScINO1, pYTK095-G1PDHΔ::Venus as donor plasmids and pYTK096-ccdB as receiving plasmid; KanR | This study |
| pYTK096-4U(CarsΔ)+ApAIPS+ScINO1 | Level 2 pathway from MaG1PDH, MaGGGPS, MaDGGGPS, ApAIPS, and ScINO1; AfCarS replaced by Venus; Derived from pYTK095-MaG1PDH, pYTK095-MaGGGPS, pYTK095-MaDGGGPS, pYTK095-ApAIPS, pYTK095-ScINO1, pYTK095-AfCarSΔ::Venus as donor plasmids and pYTK096-ccdB as receiving plasmid; KanR | This study |
| pCUT-KanMX | For the induction of double-strand breaks at 106a locus, Cas9/sgRNA cassette, KanMXR;  gRNA: ATACGGTCAGGGTAGCGCCC | Zhang et al., 2023 |

## Supplementary Table 2 | Primers and synthetic gene sequence

| Primer | 5’-3’ |
| --- | --- |
| Ap-AIPS | F:GGTGAGTTGAGAAGAggatcctaactcgagagcttttg  R:gatccTCTTCTCAACTCACCAGCAATATAAACCATTC |
| pYTK095-ApAIPS vector | F:GGTGAGTTGAGAAGAggatcctaactcgagagcttttg  R:ATTAAAAACACCCATagaaccgtgatgatgatgatgatg |
| Sc-INO1 | F:catcacggttctATGACAGAAGATAATATTGCTCCAATCACCTC  R:gttaggatccCAACAATCTCTCTTCGAATCTTAGTTCGTTTTGAG |
| pYTK095-ScINO1 vector | F:GAGATTGTTGggatcctaactcgagagcttttg  R:CTTCTGTCATagaaccgtgatgatgatgatgatg |
| Synthetic gene | 5’-3’ |
| ApAIPS (opt) | ATGGGTGTTTTTAATAGATTGAGATCTTTTTATGAAGCTAGAATTGCTCCAACTGTTGCTTCTTTTTTATCTAGAATTTCTCCTGATCCAAATATTTATACTTTGGCTTCTCCTGTTGCAGCTGCAGCTGCTTTGCCTGCTTGGTTGTATATTTCTCCTGTCGCTTCTTTGTTGTTAATTGCTTTGTCTTTGTTATTGGACGCAGTTGATGGTGCTGTTGCTAGATTTACTGGTAGAGTTTCTCCATTGGGTTCTTTTTTGGATTCTTCTTTGGATAGAATTTCTGATTCTTTGTATCATGCTACTTTGTATATTGCTGGTGTCCATCCATTGATTGTTATTGCTATGTTGTCTGGTGGTTTGATTGTTCCATATTTGAGAGCTAAAGGTGAATCTTTGGGTTTGGAAGTTAGAGGTAGAGGTTTGATGGAAAGAGGTGAAAGATCTATTGCTATCTTGGCAATCTTGGCTATTTCAATTTATAATTTGCAAACTGCTTTGGCTTTGGCTTCTGCTGCAGCTGTCTTGGTTTGGATTACTGTTATTCAAAGAATGGTTTATATTGCTGGTGAGTTGAGAAGATAA |

## Supplementary Table 3 | Strains

| **Strain** | **Description** | **Reference** |
| --- | --- | --- |
| *E. coli* DH5α | F-φ80 lac ZΔM15 Δ(lacZYA-arg F) U169 endA1 recA1 hsdR17(rk-,mk+) supE44λ- thi -1 gyrA96 relA1 phoA | Tsingke Biotechnology |
| *S. cerevisiae* Gty116 | *MAT***a**, *leu2-3*,*112::HIS3MX6*_PGAL1-*ERG19*/PGAL10-*ERG8*; *ura3-52::URA3*_PGAL1-*MvaSA110G*/PGAL10-*MvaE*(opt); *his3Δ1::hphMX4*_PGAL1-*ERG12*/PGAL10-*IDI1*; *trp1-289::TRP1*_PGAL1-*CrtE*(X.den)/PGAL10-*ERG20*; *YPRCdelta15::NatMX*_PGAL1-*CrtE*(opt)/PGAL10-*CrtE* | Reider Apel et al., 2017 |
| *S. cerevisiae* 4U | Linearized plasmid pYTK096-Ma was integrated into *106a* locus of *S. cerevisiae* Gty116; Resultant strain is denoted as 4U in this study | Zhang et al., 2023 |
| 4U+A | Linearized plasmid pYTK096-4U+ApAIPS was integrated into *106a* locus of *S. cerevisiae* Gty116 | This study |
| 4U+I | Linearized plasmid pYTK096-4U+ScINO1 was integrated into *106a* locus of *S. cerevisiae* Gty116 | This study |
| 4U+AI | Linearized plasmid pYTK096-4U+ApAIPS+ScINO1 was integrated into *106a* locus of *S. cerevisiae* Gty116 | This study |
| 4U-G+AI | Linearized plasmid pYTK096-4U(G1PDHΔ)+ApAIPS+ScINO1 was integrated into *106a* locus of *S. cerevisiae* Gty116 | This study |
| 4U-C+AI | Linearized plasmid pYTK096-4U(CarSΔ)+ApAIPS+ScINO1 was integrated into *106a* locus of *S. cerevisiae* Gty116 | This study |

## Supplementary Table 4 | Electroformation protocol for GUVs preparation

| **Step** | **Times (min)** | **Amol (V)** | **Freq (Hz)** | **Temp (℃)** |
| --- | --- | --- | --- | --- |
| **Initiate** | 5 | 1 | 10 | 60 |
| **Main** | 35 | 1 | 10 | 60 |
| **Detach 1** | 36 | 1 | 3 | 60 |
| **Detach 2** | 50 | 1 | 3 | 60 |
| **Detach 3** | 51 | 1 | 1 | 60 |
| **Detach 4** | 57 | 1 | 1 | 60 |
| **Detach 5** | 58 | 1 | 0.5 | 60 |
| **Detach 6** | 64 | 1 | 0.5 | 60 |
| **Detach 7** | 66 | 1 | 0 | 60 |
